# SMAD pathway mediation of BDNF and TGF $\beta$ 2 regulation of proliferation and differentiation of hippocampal granule neurons

Jie Lu<sup>1</sup>, Yan Wu<sup>1</sup>, Nuno Sousa<sup>2</sup> and Osborne F. X. Almeida<sup>1,\*</sup>

<sup>1</sup>NeuroAdaptations Group, Max Planck Institute of Psychiatry, Kraepelinstrasse 2-10, D-80804 Munich, Germany

<sup>2</sup>Neuroscience Group, Life and Health Sciences Research Institute (ICVS), University of Minho, Campus de Gualtar, 4710-057 Braga, Portugal

\*Author for correspondence (e-mail: osa@mpipsykl.mpg.de)

Accepted 9 May 2005

Development 132, 3231-3242

Published by The Company of Biologists 2005

doi:10.1242/dev.01893

## Summary

Hippocampal granule cells self-renew throughout life, whereas their cerebellar counterparts become post-mitotic during early postnatal development, suggesting that locally acting, tissue-specific factors may regulate the proliferative potential of each cell type. Confirming this, we show that conditioned medium from hippocampal cells (CM<sub>Hippocampus</sub>) stimulates proliferation in cerebellar cultures and, vice versa, that mitosis in hippocampal cells is inhibited by CM<sub>Cerebellum</sub>. The anti-proliferative effects of CM<sub>Cerebellum</sub> were accompanied by increased expression of the cyclin-dependent kinase inhibitors p21 and p27, as well as markers of neuronal maturity/differentiation. CM<sub>Cerebellum</sub> was found to contain peptide-like factors with distinct anti-proliferative/differentiating and neuroprotective activities with differing chromatographic properties. Preadsorption of CM<sub>Cerebellum</sub> with antisera against candidate cytokines showed that TGF $\beta$ 2 and BDNF could account for the major part of the anti-proliferative and pro-differentiating activities, an interpretation strengthened by studies

involving treatment with purified TGF $\beta$ 2 and BDNF. Interference with signaling pathways downstream of TGF $\beta$  and BDNF using dominant-negative forms of their respective receptors (TGF $\beta$ 2-RII and TRKB) or of dominant-negative forms of SMAD3 and co-SMAD4 negated the anti-proliferative/differentiating actions of CM<sub>Cerebellum</sub>. Treatment with CM<sub>Cerebellum</sub> caused nuclear translocation of SMAD2 and SMAD4, and also transactivated a TGF $\beta$ 2-responsive gene. BDNF actions were shown to depend on activation of ERK1/2 and to converge on the SMAD signaling cascade, possibly after stimulation of TGF $\beta$ 2 synthesis/secretion. In conclusion, our results show that the regulation of hippocampal cell fate in vitro is regulated through an interplay between the actions of BDNF and TGF $\beta$ .

Key words: Neurogenesis, Apoptosis, Neuronal differentiation, Hippocampus, Cerebellum, TGF $\beta$ 2, BDNF, SMAD, Rat

## Introduction

Control of cell fate, including the mechanisms that govern cell proliferation, differentiation and death, is a central theme in developmental neurobiology. Previous studies have indicated the importance of neurotrophic factors in neurogenesis (Yoshimura et al., 2001; Tao et al., 1997; Borghesani et al., 2002) and of cellular dialogue in cell fate decisions (Renfranz et al., 1991; Vicario-Abejón et al., 1995; Suhonen et al., 1996; Alder et al., 1999). Besides contributing to a better understanding of these biological processes, identification of the instructive and permissive factors and their signaling pathways will provide leads for prevention and cell-replacement strategies in neurodegenerative and other diseases of the brain.

Granule cells of the cerebellum and hippocampal dentate gyrus share several morphological commonalities (Ramon y Cajal, 1911); in addition, they both display dependencies on, or expression of, a common set of growth factors and signaling pathways (Dreyfus, 1998). However, cerebellar and hippocampal granule cells show distinct differences in their repertoire of glutamate receptor subtypes (Monyer et al., 1994) and gene expression profiles (Saito et al., 2002), features that

most probably reflect their different physiological roles. These similar, but also divergent, properties make these two types of granule neuron interesting models for analyzing the intrinsic factors responsible for the regulation of their proliferation and maturation. Both dentate and cerebellar granule cells first appear late in embryogenesis, with peak numbers appearing during the first postnatal week (Altman, 1972; Altman and Bayer, 1990; Schlessinger et al., 1975). Hippocampal granule cells continue to proliferate throughout life, although the rate of proliferation wanes with age (Altman and Bayer, 1990; Kuhn et al., 1996; Cameron and McKay, 2001). By contrast, the genesis of cerebellar granule cells terminates within the first two weeks of life (Altman, 1972). Interestingly, gene profiling studies revealed that genes involved in oncogenesis and ribosomal protein synthesis are most strongly expressed at the peak of cerebellar granule cell production (Saito et al., 2002); of the five gene clusters analyzed in that study, none showed any particular temporal pattern of expression in the dentate gyrus.

To examine the hypothesis that tissue-specific factors may serve as 'start' and 'stop' controls of proliferation in different brain areas, we here measured neurogenesis by

bromodeoxyuridine (BrdU) incorporation in immunochemically characterized cells after exchanging conditioned medium (CM) between rat postnatal day 4 (P4) hippocampal and P7 cerebellar granule cell cultures; medium exchanges were performed over a period covering the appearance of the subgranular (secondary germinative) layer of the hippocampus (Altman and Bayer, 1990) and the start of the disappearance of the external granule layer of the cerebellum (Altman, 1972). Our studies reveal that TGF $\beta$ 2 and BDNF of cerebellar origin have strong anti-proliferative and neuronal differentiating properties when applied to mitotic hippocampal granule cells.

## Materials and methods

### Primary cell cultures and conditioned medium

Hippocampal, cerebellar and cortical primary cell cultures were prepared as previously described (Crochemore et al., 2005). Briefly, hippocampal (P4) and cerebellar (P7) cells obtained from P4 Wistar rats were dissociated using the Papain Dissociation System (Worthington Biochemicals) and plated on poly-d-lysine-coated glass coverslips (400 cells/mm<sup>2</sup>). Cultures were maintained (37°C, 5% CO<sub>2</sub>/95% air, 90% relative humidity) in Neurobasal A medium/B27 Supplement and 1 mM GlutamaxI and 0.1 mg/ml kanamycin (all from Invitrogen), half of which was renewed every 3 days. Experiments were started 8–14 days after plating. Immunocytochemical analysis revealed that the cultures comprised ~40% neurons (NeuN-, TuJ1- or doublecortin-immunopositive), ~10% astroglial cells (glial fibrillary acidic protein-positive) and ~50% progenitor (nestin-positive) cells. Twenty-four hours before experiments, the culture medium was completely replaced with conditioned medium (CM) from either cerebellar (CM<sub>Cerebellum</sub>) or hippocampal (CM<sub>Hippocampus</sub>) cultures containing BrdU (20  $\mu$ M). Treated cultures were fixed with 4% paraformaldehyde (PFA) 24 hours later and processed for the immunocytochemical detection of BrdU.

### Slice culture

Cerebellar and hippocampal 'interface' slice cultures were prepared from P7 Wistar rats based on a protocol published by Norberg et al. (Norberg et al., 1999). Briefly, hippocampal and cerebellar slices (400  $\mu$ m) were placed on Millicell semiporous membranes in six-well plates (Millipore). Slices from each brain area were placed adjacent to each other in a single well and bathed in 50% OPTI-MEM/Dulbecco's modified Eagle's Medium (DMEM), including 10% fetal bovine serum, 15% horse serum, 1 mM Glutamax and 0.1 mg/ml kanamycin in Hank's buffered saline solution (all from Invitrogen). Co-cultures were maintained at 37°C (90% humidity) for 16 days, with medium changes every 3 days. Cultures were treated with BrdU (20  $\mu$ M, 24 hours) before fixation (4% PFA).

### HiB5 hippocampal cell line

Neural precursor SV40 T large antigen-immortalized HiB5 cells (Renfranz et al., 1991) (kindly provided by Dr Nina Rosenqvist, Lund, Sweden) were maintained in DMEM containing 10% fetal calf serum and 1% kanamycin at the permissive temperature (32°C) and a 5% CO<sub>2</sub> environment.

### Immunocytochemistry

Slice and dispersed cell cultures were fixed in 4% paraformaldehyde, permeabilized (0.3% Triton-X100/PBS) and incubated in 3% donkey serum/0.3% Triton (30 minutes) before incubation (1 hour; room temperature) with primary antibodies diluted 1:500 in 3% donkey serum/0.3% Triton X-100 in PBS: anti-BrdU (DAKO), anti-Nestin (Chemicon), anti-TuJ1 (Babco), anti-MAP2 (Sigma), anti-doublecortin (Santa Cruz Biotechnology), anti-GFAP (Sigma), anti-

$\alpha$ Mash1 and anti- $\alpha$ Mash1 (kind gifts from Dr Jane Johnson, Dallas, TX). After washing in PBS, cells and slices were incubated (30 minutes, room temperature) with biotinylated anti-mouse or anti-rabbit secondary antibody (1:500; Sigma), washed and incubated (30 minutes) with FITC- or horseradish peroxidase-conjugated Avidin (1:500; Sigma). HRP was developed with diaminobenzidine. In some instances, nuclear staining was achieved using Hoechst 33342 (1:1000 in PBS; 15 minutes; Roche). Cells staining positive for BrdU or one of the various neural markers were counted with respect to the total number of cells in five randomly chosen microscopic fields (0.072 mm<sup>2</sup>; 400 $\times$  magnification) across the long axis of each object; an average of 1000 cells were sampled on each coverslip and the results shown represent values from 6–10 coverslips per treatment.

### Cell death assay

Cell death was examined in 4% PFA-fixed cells by TUNEL histochemistry (Almeida et al., 2000) or Hoechst 33342 staining. Apoptotic cells were identified as dark-brown nuclear staining showing DNA fragmentation without plasma membrane damage. The relative number of apoptotic versus total number of cells was measured in at least five randomly chosen microscopic fields (400 $\times$  magnification).

### Western blotting

Cells were harvested in lysis buffer, briefly sonicated (on ice). Lysates were cleared by centrifugation, and proteins were electrophoretically resolved on 10 or 8% SDS polyacrylamide gels before transfer onto nitrocellulose membranes. Membranes were blocked (5% non-fat milk and 0.2% Tween-20 in PBS), and incubated with specific primary antibodies (anti-MAP2a/b, Sigma, 1:5000; anti-synapsin, Chemicon, 1:400; anti-p21, Pharmingen, 1:500; anti-p27, Santa Cruz, 1:200). Antigens were revealed by enhanced chemoluminescence (Amersham Biosciences) after incubation with appropriate horseradish peroxidase-IgG conjugates (Amersham).

### Concentration and purification of conditioned medium from cerebellar cultures (CM<sub>Cerebellum</sub>)

A total of 1 L of CM<sub>Cerebellum</sub> was collected from cultures between 8 and 14 days in vitro (d.i.v.). A 100-fold concentrate, containing peptides with a  $M_r$  greater than 6 kDa, was prepared using Vivaspin columns (Vivascience) before running through Q-ion exchange columns (Vivapure 20; Vivascience) and elution with a sequential salt gradient buffer. Bio-active fractions were further separated on Affigel blue columns (BioRad) and analyzed for their proliferative, differentiating and apoptotic properties (see above).

### Heat lability test

Concentrated (100 $\times$ ) CM<sub>Cerebellum</sub> was boiled for 15 minutes before addition to hippocampal cultures and measurement of bioactivity (cell proliferation and neuronal markers).

### Immunoneutralization

Antibodies against brain-derived neurotrophic factor (BDNF) and nerve growth factor (NGF) were purchased from Santa Cruz Biotechnology; antibodies against TGF $\beta$ 2 were from R&D Systems. All antisera were purified IgG, and species-matched purified IgG preparations (Chemicon) were used in controls. CM<sub>Cerebellum</sub> was adsorbed with these antisera for 1 hour (room temperature) before being added to cell cultures at dilutions ranging from 1:10 to 1:10,000, after which the biological activity of the CM<sub>Cerebellum</sub> was assessed (see above).

### BDNF studies

Results from the BDNF immunoneutralization experiments were confirmed by adding BDNF (hBDNF, 10–100 ng/ml; Alomone Laboratories) to hippocampal cultures at 7 d.i.v., and monitoring for BrdU incorporation and MAP2a/b expression after 24 hours.

Further verification of BDNF effects was obtained by transiently transfecting primary hippocampal cultures with a BDNF expression vector (pcDNA3-BDNF-Citron, kindly provided by Dr Oliver Griesbeck, Martinsried, Germany) or pEGFP (as control). Transfection was carried out using 1 µg DNA/well and Lipofectamine 2000 (Invitrogen) under serum-free conditions. Twenty-four hours after transfection, media were exchanged between BDNF- and EGFP-transfected cells, and BrdU (20 µM) was added to the cultures. BrdU incorporation was assessed after a further 24 hours.

MAP kinase mediation of the pro-mitotic actions of BDNF was examined by assaying BrdU retention and MAP2a/b expression after treating cultures with the MEK inhibitor PD98059 (0.1 µM; Calbiochem). The ability of BDNF (100 ng/ml) to stimulate cytoplasm-to-nucleus translocation of key TGFβ signaling partners was analyzed by transiently transfecting hippocampal cultures with fluorescence-tagged *Smad2* and *Smad4* (see below) and microscopic examination.

Cellular contents of TGFβ2 after BDNF or CM<sub>Cerebellum</sub> treatment were measured by semi-quantitative immunocytochemistry, using recombinant TGFβ2 standards and ABTS [2,2'-azino-di-(3 ethylbenzthiazoline sulfonic acid)] as chromogen. Attempts were made to measure secreted TGFβ using either a commercial ELISA kit (Promega) or the plasminogen activator inhibitor 1 (PA1)-luciferase assay described by Abe et al. (Abe et al., 1994). For the latter assay, mink lung epithelial cells (MLEC, clone 32) stably transfected with PA1-luciferase, were kindly provided by Dr D. Rifkin (New York, NY). Neither assay proved to be sufficiently sensitive to measure secreted TGFβ2.

### Nuclear translocation of SMADs

To study nuclear translocation of SMAD, primary hippocampal neurons (7 d.i.v.), were transfected with pEGFP-SMAD2 or pEGFP-SMAD4 (kindly provided by Dr Kelly Mayo, Evanston, IL). Transfection was carried out using 1 µg DNA/well and Lipofectamine 2000. Transfection efficiency, judged in control transfections with pEGFP, was ~10%. Following transfection, cells were returned (3 hours) to standard growing medium or CM<sub>Cerebellum</sub> or exposed to TGFβ2 (1 ng/ml) or BDNF (100 ng/ml), stained with Hoechst 33342 and examined.

### Receptor signaling

Analysis of BDNF (TRKB) and TGFβ receptor (TGFβ-RII) signaling was studied in primary hippocampal cells after transfection (see above) with 1 µg/well of the following plasmids: dominant-negative TGFβRII (pRK5-TβRII-DN-F; generously provided by Dr R. Derynck, San Francisco, CA, USA) and TRKB dominant-negative (pEF/BOS-TRKB.T1-Flag; kind gift from Dr Eero Castren, Helsinki, Finland); pEGFP was used as an internal control. Twenty-four hours after transfection and exposure to either control or CM<sub>Cerebellum</sub>, the number of BrdU-positive or MAP2a/b-positive cells was counted as a proportion of all cells (stained with Hoechst 33342). Transfection efficiency was approximately 10%.

### SMAD signaling

Analysis of SMAD signaling was studied in primary hippocampal cells after transfection (see above) with 1 µg/well of either dominant-negative SMAD3 [pCS2-FLAG-SMAD3(3S-A)] or dominant-negative SMAD4 [pCMV5-FLAG-DPC4(1-514)] (provided by Dr Joan Massague, New York, NY); pEGFP was used as an internal control. Transfection efficiency was ~10%. Twenty-four hours after transfection and exposure to either control or CM<sub>Cerebellum</sub>, the number of BrdU-positive or MAP2a/b-positive cells were assessed with respect to the number of Hoechst 33342-stained cells.

### 3TP-Lux reporter assay

The p3TP-Lux reporter gene, containing a known TGFβ-inducible plasminogen activator inhibitor promoter (Wrana et al., 1994)

(provided by Dr J. Massague), was transfected into HiB5 cells seeded in 24-well plates (4×10<sup>4</sup> cells per well), together with dominant-negative SMADs, dominant-negative TRKB and TGFβRII, or wild-type BDNF. Plasmid (625 ng of total DNA) was introduced using Lipofectamine 2000 into cells maintained in Neurobasal A medium/B27 supplement. Twenty-four hours after transfection (efficiency ~10%), cells were treated with CM<sub>Cerebellum</sub> (10 µl/ml). Cells were lysed after 24 hours in 100 µl of 1× lysis buffer (Promega), cleared by centrifugation and assayed for β-gal and luciferase activity. For β-gal detection, 10 µl of cellular extract was mixed with 100 µl of β-gal buffer (60 mM Na<sub>2</sub>HPO<sub>4</sub>, 40 mM NaH<sub>2</sub>PO<sub>4</sub>, 10 mM KCl, 1 mM MgCl<sub>2</sub>, 2 mM β-mercaptoethanol) and 20 µl of O-nitrophenyl-β-D-galactopyranoside (Sigma). The reaction was terminated with 50 µl of Na<sub>2</sub>CO<sub>3</sub> (1 M) and luciferase activity was measured by mixing 30 µl of cellular extract with 50 µl of a buffer containing 75 mM Tris-HCl and 1 mM MgCl<sub>2</sub> (pH 8). Substrate D-(−) Luciferin (1 mM) was automatically injected and light emission (410 nm) was measured over 20 seconds in a luminometer.

### Statistical analysis

All data are depicted as mean±s.d. and represent the observations from three to five independent experiments, with three or four replicates for each data point. Data were analyzed for statistical significance using ANOVA and appropriate post-hoc tests (Student-Newman-Keuls or Kruskal-Wallis multiple comparison procedures) in which *P*<0.05 was set as the minimum level of significance.

## Results

### Spontaneous expression of markers of neuronal proliferation, differentiation and apoptosis

Hippocampal and cerebellar cultures (8-19 d.i.v.) displayed a dense network of neurites specifically labeled with TuJ1 (anti-tubulin-βIII) (Fig. 1A). Postmitotic cerebellar cells were evidenced by positive labeling with anti-MATH1, a basic helix-loop-helix (bHLH) transcription factor known to be essential for cerebellar granule cell development (Ben-Arie et al., 1997), and with anti-MASH1, a neuronal commitment gene (Ross et al., 2003). Hippocampal cultures were MATH1 negative and MASH1 positive, indicating the presence of immature neurons (Pleasure et al., 2000). Cerebellar and hippocampal cultures displayed mitosis (BrdU incorporation; blue-black nuclei) and apoptosis (brown, TUNEL-stained cells with nuclear fragmentation) concomitantly.

### Cerebellar 'stop' signals vs. hippocampal 'go' signals

BrdU incorporation by hippocampal cultures maintained in conditioned medium derived from cerebellar cultures (CM<sub>Cerebellum</sub>) was used to test the hypothesis that cerebellar cells secrete factors that can serve as an 'instructive' micro-environment. As shown in Fig. 1B, exposure of hippocampal cultures to CM<sub>Cerebellum</sub> resulted in a significant reduction in BrdU incorporation (*P*<0.001); the converse experiment (cerebellar cultures treated with CM<sub>Hippocampus</sub>) resulted in a significant increase of BrdU-positive cerebellar cells (*P*<0.01) (Fig. 1C). Similar results were obtained when hippocampal and cerebellar slices (donor age: 7 days) were co-cultured for 7 days. Monitoring of BrdU retention (20 µM, final 24 hours; Fig. 1D) showed that cell proliferation in hippocampal slices was significantly reduced in the presence of cerebellar slices when compared with when hippocampal slices were grown alone (*P*<0.01); by contrast, cell proliferation in cerebellar



slices was slightly, but not significantly, increased in the presence of hippocampal tissue.

The above results indicate that soluble factors with mitotic and anti-proliferative properties are secreted into CM<sub>Hippocampus</sub> and CM<sub>Cerebellum</sub>, respectively; the remainder of our investigations focused on the anti-proliferative activity of CM<sub>Cerebellum</sub> on hippocampal cells. Incubation of hippocampal cell cultures with varying volumes of 100-fold concentrated CM<sub>Cerebellum</sub> established that its putative anti-proliferative activity dose-dependently reduces BrdU incorporation in primary hippocampal cells (Fig. 1E) and in a hippocampus-derived cell line, HiB5 (Fig. 1F). An insight into the physicochemical nature of the putative anti-proliferative factor(s) was gained by assaying the effects of boiled 100-fold concentrated CM<sub>Cerebellum</sub> on BrdU incorporation by recipient

hippocampal cells. As Fig. 1E (last column) shows, the anti-mitotic activity of CM<sub>Cerebellum</sub> was abolished by boiling for 15 minutes, pointing to the peptidergic/proteinaceous nature of the anti-proliferative moieties.

### Expression of negative regulators of the cell cycle and markers of neuronal differentiation

A series of experiments showed that factors present in CM<sub>Cerebellum</sub> can induce cell cycle arrest within that subpopulation of cells destined to become neurons while simultaneously accelerating neuronal maturation. CM<sub>Cerebellum</sub>-induced arrest of progression through the cell cycle was demonstrated (western blot analysis) by increased expression of the cyclin-dependent kinase (CDK) inhibitors, p21 and p27 (Fig. 2A). These changes were accompanied by enhanced

**Fig. 1.** Cerebellar ‘stop’ versus hippocampal ‘go’ signals. (A) Characteristics of hippocampal and cerebellar neuronal cultures under basal conditions, showing expression of the neuronal markers TuJ1, MASH1 and MATH1, and levels of apoptosis (TUNEL, dark brown) and proliferation (BrdU incorporation, blue-black). (B,C) Exposure of hippocampal cells to CM<sub>Cerebellum</sub> reduces BrdU incorporation (B); exposure of cerebellar cultures to CM<sub>Hippocampus</sub> stimulates BrdU uptake (C). (D) In hippocampal-cerebellar slice co-cultures, hippocampal cell proliferation is reduced in the presence of cerebellar slices, whereas cerebellar cell proliferation is slightly increased in the presence of hippocampal tissue. Dose dependency of CM<sub>Cerebellum</sub> anti-mitotic effects in hippocampal cultures are shown in E; the peptidergic nature of the anti-proliferative activity present in CM<sub>Cerebellum</sub> is indicated by the fact that anti-proliferative activity is lost after boiling CM<sub>Cerebellum</sub>. CM<sub>Cerebellum</sub> also exerts anti-proliferative effects on hippocampus-derived HiB5 cells (F). Scale bar: 50  $\mu$ m. Numerical data refer to mean  $\pm$  s.d. ( $n=4-6$ ) \* $P<0.05$ , \*\* $P<0.01$ , \*\*\* $P<0.001$  (versus appropriate controls).

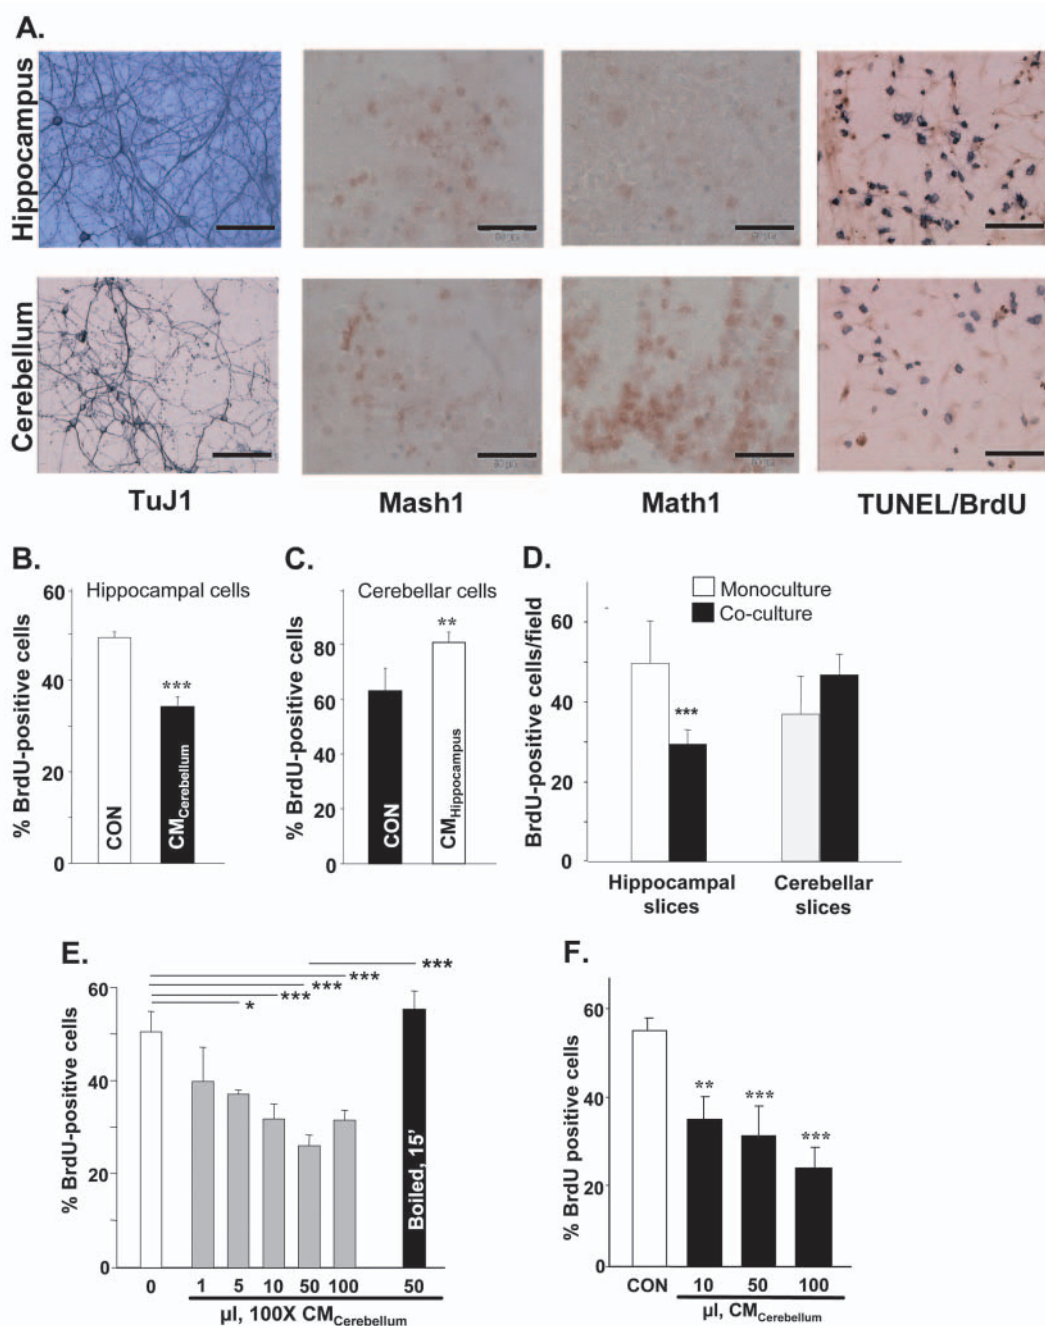

numbers of cells displaying signs of neuronal maturity (immunofluorescence and/or western blot analysis); specifically, exposure to CM<sub>Cerebellum</sub> resulted in increased synapsin (not shown) and MAP2a/b (Fig. 2B,C) expression and, concomitantly, in a small but significant ( $P<0.05$ ) decrease in the number of cells immunoreactive for the marker of early postmitotic neuroblasts, doublecortin (Fig. 2D). Interestingly, CM<sub>Cerebellum</sub> had no significant effect on the relative number of glial (GFAP-immunopositive) cells in the hippocampal cultures (data not shown); in fact, the majority of BrdU-positive cells in hippocampal cultures grown in CM<sub>Cerebellum</sub> had differentiated into neurons after 3 days, as shown by double-labeling for BrdU and MAP2a/b (Fig. 2E).

#### Presence of multiple factors with differing anti-proliferative and pro-differentiation or pro-apoptotic properties in CM<sub>Cerebellum</sub>

On the premise that more than one factor may account for the anti-mitotic actions of CM<sub>Cerebellum</sub>, concentrated CM<sub>Cerebellum</sub> was fractionated according to ionic strength after minimizing albumin interference using Affigel Blue chromatography. The four fractions that were eluted with NaCl (0.1–1.5 M) showed differing potencies on the proliferative, differentiating and apoptotic potential of hippocampal cells (Table 1). Specifically, fractions eluting at 0.1 M NaCl had significant anti-mitotic ( $P<0.001$ ) and anti-apoptotic ( $P<0.05$ ) activities; fractions eluting at 1 M NaCl proved effective at promoting neuronal maturation ( $P<0.05$ ) and strong anti-apoptotic activity was observed in eluates containing 1.5 M NaCl ( $P<0.001$ ). Thus, CM<sub>Cerebellum</sub> contains a cocktail of factors that differentially direct hippocampal cell fate. Non-fractionated CM<sub>Cerebellum</sub> did not elicit any significant change in the incidence of apoptosis ( $F_{11,24}=1.373$ ,  $P=0.28$ ; Table 1).

#### Identification of anti-proliferative and differentiating factors

Data reported above indicated that the active factor(s) of interest in CM<sub>Cerebellum</sub> were heat unstable and had a  $M_r$  greater than 6 kDa. Accordingly, we analyzed the effects of immunoneutralization of three candidate trophic factors, previously implicated in neuronal birth, differentiation and death, namely, NGF, BDNF and TGF $\beta$ 2 (Minichilo and Klein, 1996; Massague et al., 2000; Borghesani et al., 2002; Vaudry et al., 2003), on BrdU incorporation and differentiation (MAP2a/b expression). Immunocytochemistry showed the presence of all these peptides in cerebellar and hippocampal cultures (data not shown). BrdU incorporation by hippocampal

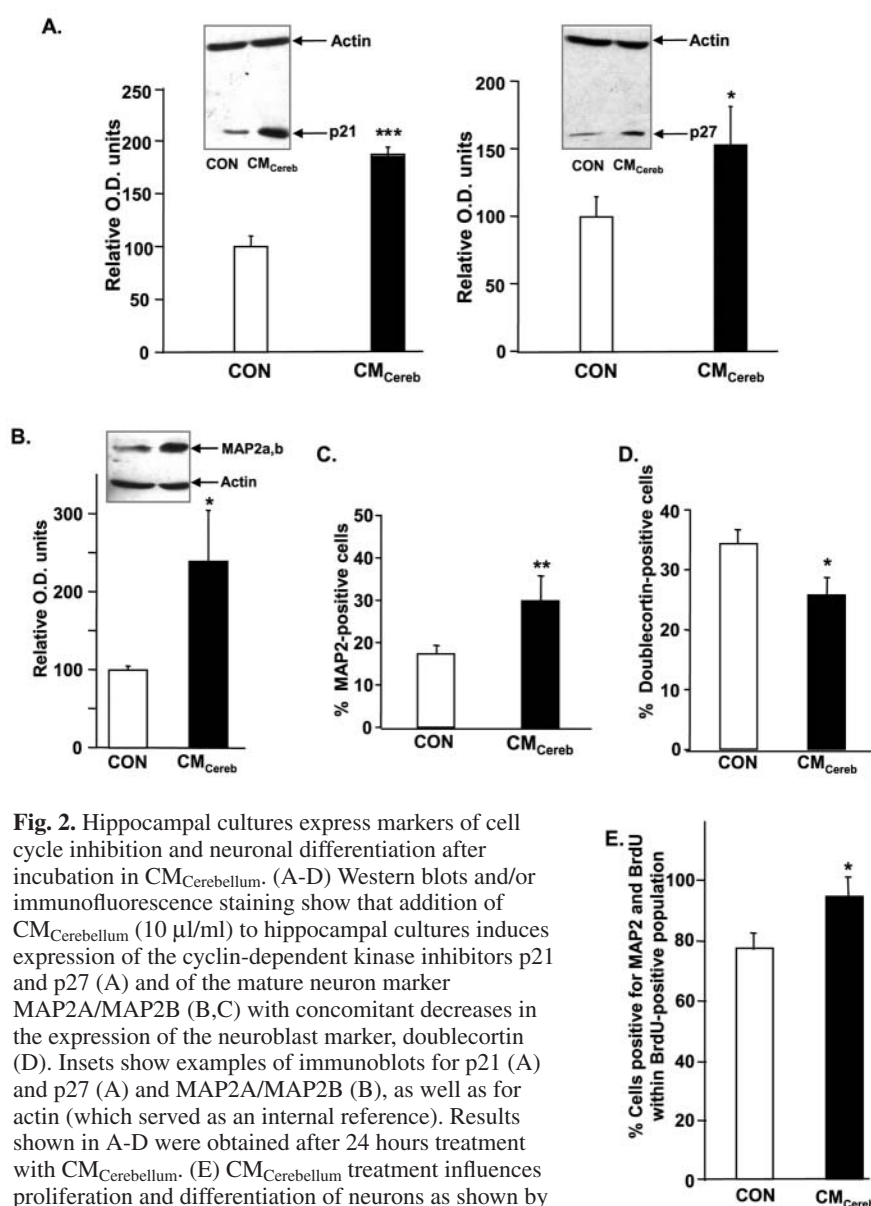

**Fig. 2.** Hippocampal cultures express markers of cell cycle inhibition and neuronal differentiation after incubation in CM<sub>Cerebellum</sub>. (A–D) Western blots and/or immunofluorescence staining show that addition of CM<sub>Cerebellum</sub> (10  $\mu$ l/ml) to hippocampal cultures induces expression of the cyclin-dependent kinase inhibitors p21 and p27 (A) and of the mature neuron marker MAP2A/MAP2B (B,C) with concomitant decreases in the expression of the neuroblast marker, doublecortin (D). Insets show examples of immunoblots for p21 (A) and p27 (A) and MAP2A/MAP2B (B), as well as for actin (which served as an internal reference). Results shown in A–D were obtained after 24 hours treatment with CM<sub>Cerebellum</sub>. (E) CM<sub>Cerebellum</sub> treatment influences proliferation and differentiation of neurons as shown by the significantly increased number of MAP2A/MAP2B-positive/BrdU-positive double-stained cells relative to the total number of BrdU-positive cell population. For this analysis, cells growing in CM<sub>Cerebellum</sub> were exposed to BrdU for 8 hours, and washed and maintained in CM<sub>Cerebellum</sub> for 72 hours before fixing and processing for MAP2A/MAP2B and BrdU double immunocytochemistry. There was no statistical difference on the incidence of apoptosis in cultures grown in either control medium or CM<sub>Cerebellum</sub>. Numerical data refer to mean $\pm$ s.d. ( $n=4-6$ ) \* $P<0.05$ , \*\* $P<0.01$ , \*\*\* $P<0.001$  (versus appropriate controls).

cells was not affected after incubation in anti-NGF-preadsorbed CM<sub>Cerebellum</sub>. Anti-BDNF (1:10) significantly blocked the anti-proliferative effects of crude CM<sub>Cerebellum</sub> ( $P<0.05$ ), as did anti-TGF $\beta$ 2 (1:1000 and 1:100;  $P<0.01$ ) (Fig. 3A). Control cultures (treated with species-appropriate purified IgG preparations) did not differ from naive controls (data not shown).

In accordance with our earlier results that showed that CM<sub>Cerebellum</sub> concomitantly blocks proliferation of hippocampal cells while promoting their maturation (Fig. 2), immunoneutralization against TGF $\beta$ 2 (antibody

**Table 1. Proliferative, differentiating and apoptotic activities in different fractions of CM<sub>Cerebellar</sub> purified by ion-exchange chromatography**

| Medium                                                 | Biological activity                          |                                                |                                           |
|--------------------------------------------------------|----------------------------------------------|------------------------------------------------|-------------------------------------------|
|                                                        | Proliferative<br>(% BrdU <sup>+</sup> cells) | Differentiating<br>(% MAP2 <sup>+</sup> cells) | Apoptotic<br>(% TUNEL <sup>+</sup> cells) |
| Control                                                | 45.1±3.9                                     | 15.2±1.6                                       | 22.7±1.3                                  |
| CM <sub>Cerebellar</sub> Crude                         | 13.5±1.2                                     | 26.4±0.5                                       | 27.1±1.5                                  |
| Q-ion exchange chromatography CM <sub>Cerebellum</sub> |                                              |                                                |                                           |
| Eluate, 0.1 M NaCl                                     | 18.5±1.4                                     | 16.5±0.8                                       | 16.3±1.2                                  |
| Eluate, 0.5 M NaCl                                     | 38.1±3.5                                     | 13.4±0.5                                       | 21.8±2.2                                  |
| Eluate, 1 M NaCl                                       | 46.9±0.8                                     | 22.2±1.2                                       | 22.6±4.1                                  |
| Eluate, 1.5 M NaCl                                     | 46.5±1.9                                     | 19.2±2.8                                       | 8.7±1.3                                   |

Multiple factors in CM<sub>Cerebellum</sub> contribute to its anti-proliferative, anti-apoptotic and differentiation-inducing properties. Concentrated CM<sub>Cerebellum</sub> was fractionated according to ionic strength and dye affinity (Q and Affigel Blue chromatography). The four fractions that eluted with NaCl (0.1–1.5 M) differentially influenced proliferation, apoptosis and differentiation in primary hippocampal cells. Specifically, fractions with 0.1 M NaCl displayed significant anti-mitotic ( $P<0.001$ ) and anti-apoptotic ( $P<0.05$ ) effects; strong anti-apoptotic activity was observed in fractions eluting with 1.5 M NaCl ( $P<0.001$ ), whereas those eluting with 1 M NaCl promoted neuronal maturation ( $P<0.05$ ).

concentrations that proved efficient at reversing the anti-mitotic effects) significantly reduced MAP2a/b expression ( $P<0.01$ ; Fig. 3B). By contrast, anti-NGF (which did not influence proliferation) and anti-BDNF did not alter the relative number of MAP2a/b-immunoreactive cells, when compared with CM<sub>Cerebellum</sub> that had not been pre-adsorbed with these antisera (Fig. 3B).

As immunoneutralization experiments provide only qualitative information and may be compromised by factors such as antibody affinity and purity, we next examined hippocampal cell proliferation and maturation after addition of either BDNF or TGFβ2 to normal medium; for comparison, hippocampal cultures were grown in CM<sub>Cerebellum</sub>. Significant reductions in BrdU incorporation were observed after treatment with either BDNF at 50 ng/ml ( $P<0.05$ ) and 100 ng/ml ( $P<0.001$ ) (Fig. 3C) or TGFβ2 at 1 ng/ml ( $P<0.01$ ) and 10 ng/ml ( $P<0.01$ ) (Fig. 3D). The results obtained with exogenous BDNF peptide were confirmed when hippocampal cells were transfected with a BDNF expression plasmid ( $P<0.001$ , compared with cells transfected with pEGFP; inset, Fig. 3C) and when medium from pBDNF-transfected cells (24 hours) was added to pEGFP-transfected cells (third bar in inset, Fig. 3C;  $P<0.01$ ).

In addition to inhibiting cell proliferation, both exogenous BDNF and TGFβ2 were found to promote neuronal maturation, evidenced by significant increases ( $P<0.01$  and  $0.05$ , respectively) in the number of MAP2a/b-immunopositive cells after addition of purified forms of each peptide (Fig. 3E). These findings indicate that BDNF and TGFβ2 account for a large part of the pro-neuronal properties of CM<sub>Cerebellum</sub>. Using another indicator of pro-neuronal activity, namely neurite extension ('long neurites' defined as neurites with lengths that were more than twice the diameter of the cell body), we observed that both BDNF (at 10–100 ng/ml;  $P<0.05$ ) and TGFβ2 (at 1–10 ng/ml;  $P<0.05$ ) stimulated neurite growth in a manner comparable with that observed with CM<sub>Cerebellum</sub> (Fig. 3E).

The temporal patterns of BDNF and TGFβ2 expression in hippocampal and cerebellar cultures were examined using immunocytochemistry after varying numbers of days in vitro. Generally, the intensity of BDNF and TGFβ2 staining was stronger in cerebellar versus hippocampal cultures (data not shown). When compared with hippocampal cells, a significantly larger number of cerebellar cells expressed BDNF on 3 and 6 d.i.v. ( $P<0.001$  and  $P<0.05$ ; data not shown). At 9 d.i.v. (peak), more cerebellar cells than hippocampal cells were immunoreactive for TGFβ2 ( $P<0.05$ ; data not shown).

### Anti-proliferative and differentiating effects of CM<sub>Cerebellum</sub> are mediated by TRKB and TGFβ-RII receptors

CM<sub>Cerebellum</sub> failed to inhibit proliferation in primary hippocampal cells expressing dominant-negative forms of the BDNF receptor TRKB (pEF/BOS-TRKB.T1-flag) or the TGFβ receptor, TGFβ-RII (pRK5-TβRII-DN-F) (Fig. 4A). In addition, hippocampal neuronal maturation induced by CM<sub>Cerebellum</sub>, as measured by the number of MAP2a/b-immunoreactive cells, was significantly reduced in cells expressing dominant-negative forms of TRKB and TGFβ-RII (Fig. 4B). These results add further support for the roles of BDNF and TGFβ-2 as the anti-proliferative and pro-differentiation moieties in CM<sub>Cerebellum</sub>.

### Mediation of CM<sub>Cerebellum</sub>, BDNF and TGFβ2 actions by SMAD pathways

TGFβ2 exerts its biological actions through the mediation of SMAD proteins. SMAD2 and SMAD3 specifically transduce TGFβ signals after dimerizing with co-SMAD4, translocating the resulting complex to the nucleus and modulating the transcriptional machinery (Attisano and Wrana, 2002). The data depicted in Fig. 4C show that pEGFP-SMAD2 and pEGFP-SMAD4 are translocated to the nucleus after exposure of primary hippocampal neurons to CM<sub>Cerebellum</sub>, as well as to purified TGFβ2 and BDNF.

We showed in Fig. 1F that, as in primary hippocampal cells, CM<sub>Cerebellum</sub> exerts anti-mitotic actions in the hippocampus-derived HiB5 cell line. CM<sub>Cerebellum</sub> failed to inhibit proliferation or to stimulate differentiation in hippocampal cells expressing dominant-negative forms of SMAD3 (pCS2-FLAG-SMAD3-3SA) or co-SMAD4 (pCMV-FLAG-DPC4(1-514)) (Fig. 4D,E).

Another set of experiments in HiB5 cells showed that CM<sub>Cerebellum</sub> dose-dependently transactivates the specific SMAD reporter gene 3TP-Lux (Fig. 4F). Stimulation of reporter gene activity was abolished in the presence of dominant-negative forms of SMAD3 (pCS2-FLAG-SMAD3-3SA) or co-SMAD4 (pCMV-FLAG-DPC4(1-514)) (Fig. 4G), again pointing to the involvement of SMAD signaling in the mediation of CM<sub>Cerebellum</sub> actions. These and the other above-reported data do not, however, completely rule out the participation of other SMAD-linked factors, as co-SMAD4 complexes with other members of the SMAD family, independently of TGFβ; indeed, as functional inhibition of SMAD4 resulted in stronger ( $P<0.01$ ) inhibition of the anti-proliferative and differentiating effects of CM<sub>Cerebellum</sub> (Fig. 4D,E), when compared with those observed after SMAD3 inhibition, activation of other SMAD pathways by



non-TGF $\beta$  ligands is highly plausible (see Attisano and Wrana, 2002).

Last, as shown in Fig. 4H, CM<sub>Cerebellum</sub> transactivation of the 3TP-Lux SMAD reporter gene was significantly attenuated ( $P<0.01$ ) when HiB5 cells were transfected with plasmids expressing the dominant-negative forms of TGF $\beta$ RII or TRKB. These data demonstrate the essential role of TGF $\beta$ RII or TRKB receptors in coupling CM<sub>Cerebellum</sub>-initiated signals (putatively, through TGF $\beta$ 2 and BDNF, respectively) with the SMAD signaling cascade.

### BDNF actions involve convergence of MAPK and SMAD signaling pathways

Adding to the evidence that TGF $\beta$ RII are involved in mediating the biological actions of BDNF, we observed that BDNF failed

to exert anti-proliferative effects when it was applied to primary hippocampal cells that were transiently transfected with a dominant-negative form of TGF $\beta$ RII (Fig. 5A).

As BDNF signaling pathways reportedly converge on those triggered by TGF $\beta$ 2 following the activation of ERK1/2 by the neurotrophin (Segal and Greenberg, 1996; Pera et al., 2003), we pharmacologically tested the involvement of these kinases using the MEK inhibitor PD98059. This drug significantly abrogated the inhibitory effects of CM<sub>Cerebellum</sub> on BrdU incorporation ( $P<0.001$ ; Fig. 5B). PD98059 also abolished the pro-differentiating potential of CM<sub>Cerebellum</sub> ( $P<0.001$ ; Fig. 5C). Together, these observations indicate that CM<sub>Cerebellum</sub>-induced effects on proliferation and differentiation are mediated through MAP kinases and, in accordance with earlier reports (Marshall, 1995; Du et al., 2003), they hint at the involvement of BDNF in these processes.

We showed earlier that CM<sub>Cerebellum</sub>-stimulated 3TP-Lux reporter activity was attenuated when HiB cells were transiently transfected with a dominant-negative form of the BDNF receptor TRKB. In another set of experiments, we showed that expression of pBDNF also significantly increased 3TP-Lux reporter activity (Fig. 5D). However, transactivation of the reporter was not seen after co-transfection of cells with pBDNF and (1) dominant-negative TRKB, (2) dominant-negative SMAD4 or (3) PD98059 (Fig. 5D). These results

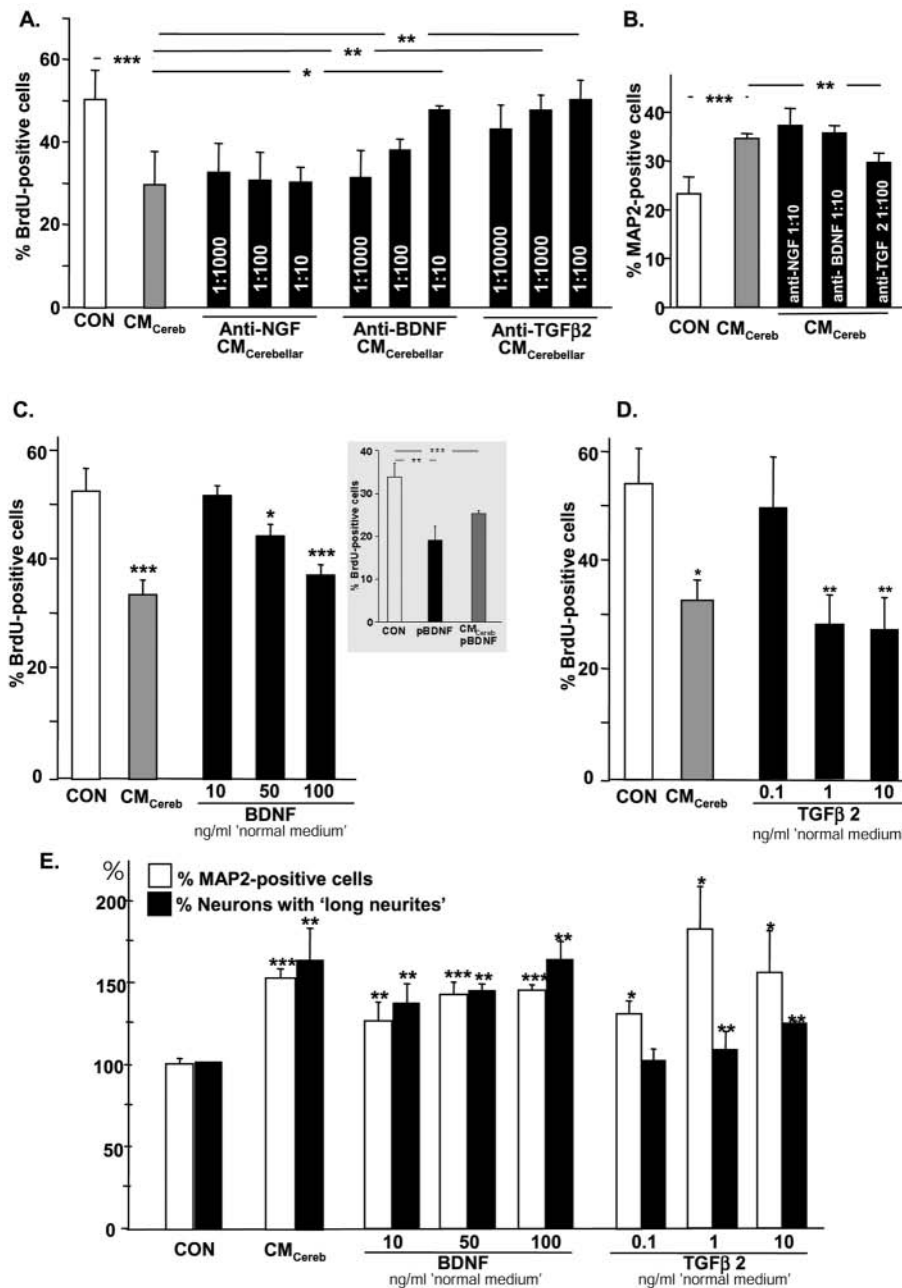

**Fig. 3.** Immunoneutralization of candidate anti-proliferative and differentiating factors in CM<sub>Cerebellum</sub> and replication of effects by exogenous BDNF and TGF $\beta$ 2. (A) CM<sub>Cerebellum</sub> was preadsorbed with the indicated dilutions of anti-NGF, BDNF or TGF $\beta$ 2. (B) Immunoneutralization of BDNF and TGF $\beta$ 2 significantly attenuates the anti-proliferative actions of CM<sub>Cerebellum</sub>; anti-TGF $\beta$ 2 significantly attenuates the pro-differentiating effects of CM<sub>Cerebellum</sub>, assessed by MAP2A/MAP2B expression. (C,D) Exogenous BDNF (C) and TGF $\beta$ 2 (D) dose-dependently inhibit BrdU retention in hippocampal cells; the inset (C), shows that transient expression of pBDNF also reduces BrdU incorporation (pEGFP used as transfection control). (E) Exogenous BDNF and TGF $\beta$ 2 promote neuronal maturation in hippocampal cultures (increased expression of MAP2A/MAP2B and neurons with neurite lengths more than twice the diameter of the soma). The control data in E, shown as 100%, represent 126/865 MAP2-positive cells (14.5%) with 'long neurites' in the BDNF studies, and 94/518 MAP2-positive cells (18.2%) with 'long neurites' in the TGF $\beta$ 2 experiments. Numerical data refer to mean $\pm$ s.d. ( $n=4-6$ ) \* $P<0.05$ , \*\* $P<0.01$ , \*\*\* $P<0.001$  (versus appropriate controls).

demonstrate that MAP kinases mediate the actions of BDNF on SMAD signaling. Interestingly, co-transfection of pBDNF with a dominant-negative form of the TGF $\beta$ RII also abrogated BDNF-stimulated activity of the 3TP-Lux reporter (Fig. 5D), indicating that the TGF $\beta$ RII is involved in the mediation of BDNF actions. This finding led us to examine the possibility that BDNF can stimulate TGF $\beta$ 2 synthesis/secretion. Using a semi-quantitative immunocytochemical assay, we observed that exposure of primary hippocampal cells to BDNF (10-100 ng/ml) can dose-dependently increase the cellular content of

TGF $\beta$ 2 (Fig. 5E). Two different assay systems used to detect secreted TGF $\beta$ 2 proved to be insufficiently sensitive (cf. Lutz et al., 2004).

## Discussion

The pluripotency of neural cell progenitors (McConnell and Kaznowski, 1991; Coskun and Luskin, 2002) implies that their ultimate phenotype can be influenced by environmental factors. Phenotypic re-specification has been demonstrated, for

**Fig. 4.** Involvement of TRKB/TGF $\beta$ -RII and TGF $\beta$ 2 signaling pathways in the anti-mitotic and differentiating effects of CM<sub>Cerebellum</sub>. (A) Transfection of cells with a dominant-negative form ( $\Delta$ ) of TRKB ( $\Delta$ TRKB) or TGF $\beta$  receptor II ( $\Delta$ TGF $\beta$ -RII) before treatment with CM<sub>Cerebellum</sub> resulted in a significant increase in proliferation (versus controls transfected with GFP) (100% refers to BrdU incorporation in absence of CM<sub>Cerebellum</sub>). (B) Results from cells treated as described above show that inhibition of expression of TGF $\beta$ -RII or TRKB prevents CM<sub>Cerebellum</sub>-induced neuronal differentiation, as measured by number of MAP2A/MAP2B-positive cells (cells not exposed to CM<sub>Cerebellum</sub> provide the reference value of 100%). (C) Exposure of hippocampal cells to CM<sub>Cerebellum</sub>, as well as to either TGF $\beta$ 2 (1 ng/ml) or BDNF (100 ng/ml) induces nuclear translocation of the TGF $\beta$ 2-specific partner SMAD2 and of co-SMAD4 within 3 hours, as shown by transient transfection experiments. (D,E) Introduction of dominant-negative forms of either SMAD3 (which specifically couples with TGF $\beta$ 2) or of Co-SMAD4 abrogates the anti-mitotic (D) and differentiating (E) effects of CM<sub>Cerebellum</sub> on primary hippocampal cells; these changes do not reflect apoptosis as the number of TUNEL-stained and activated caspase 3 cells were not altered by the treatment (data not shown). (F-H) CM<sub>Cerebellum</sub> stimulates generation of luciferase from the TGF $\beta$  reporter gene 3TP-Lux in HiB5 cells (F), an effect abrogated when expression of either SMAD3 or Co-SMAD4 is blocked by transfection with their respective dominant-negative ( $\Delta$ ) forms (G); similarly, transactivation of 3TP-Lux is blocked in the presence of  $\Delta$ TGF $\beta$ -RII and  $\Delta$ TRKB (H). Each half set of data in A,B,D,E were obtained in independent experiments in which GFP was used to control for between-culture variability in transfection efficiency. Data in G,H represent ratios of luciferase expression (fold change in treatments versus non-treated cells). In all cases, transfections were performed 24 hours before addition of CM<sub>Cerebellum</sub>, TGF $\beta$ 2 or BDNF for 24 hours, after which the analysis was performed. Numerical data refer to mean $\pm$ s.d. ( $n=4-6$ ) \* $P<0.05$ , \*\* $P<0.01$ , \*\*\* $P<0.001$  (versus appropriate controls).

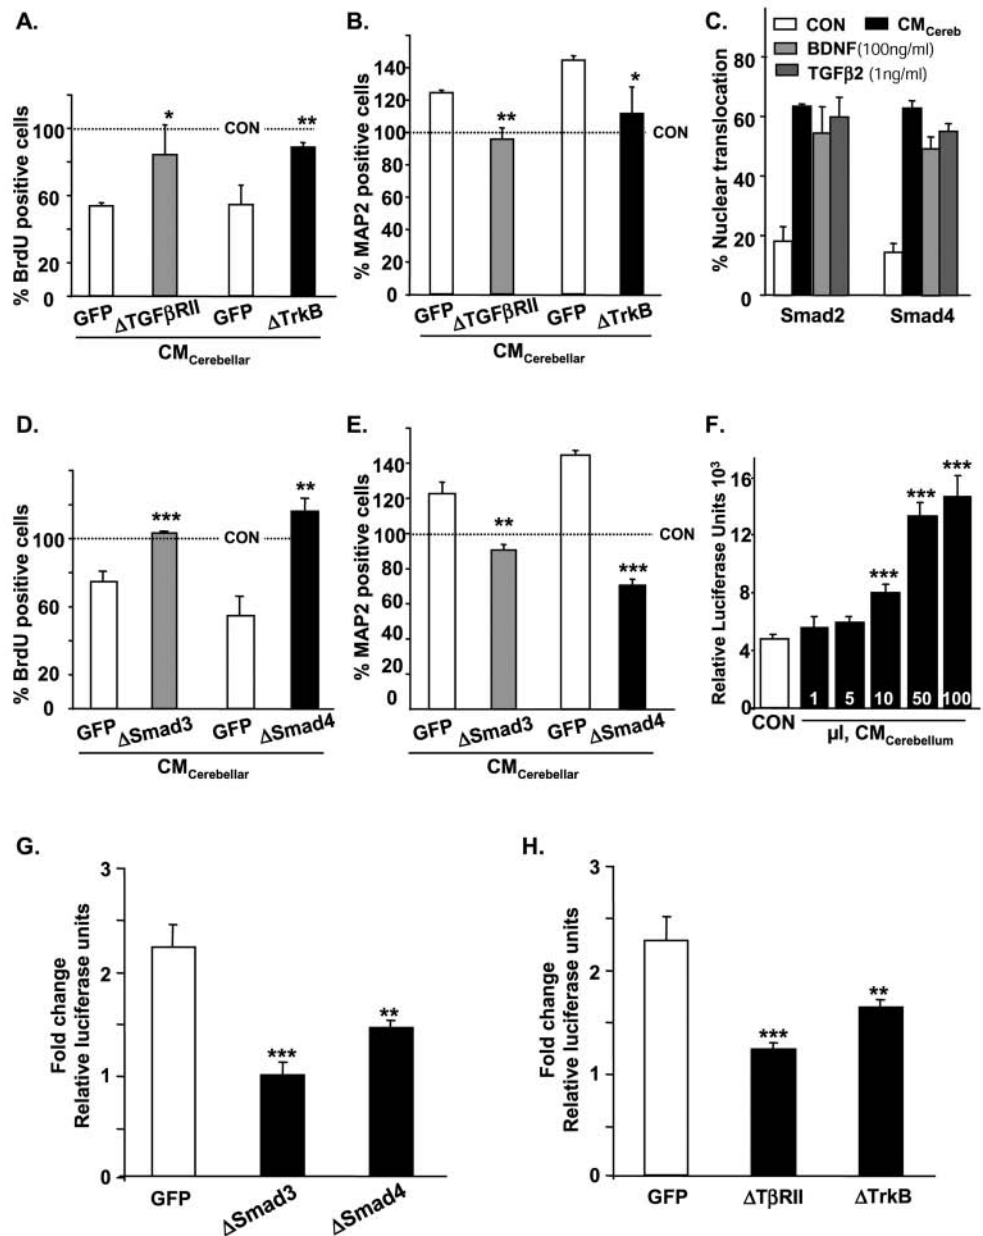



example, in studies involving hippocampal granule cell transplants into the cerebellum (Renfranz et al., 1991) and vice versa (Vicario-Abejón et al., 1995). This adaptive capacity, resulting from the interplay between lineage-specific and extrinsic factors, is gradually lost over time as the host environment becomes increasingly differentiated (Suhonen et al., 1996; Alder et al., 1999); thus, these processes appear to be spatiotemporally organized. Another intriguing aspect of neuronal development concerns the determination of optimal neuronal population sizes. It is recognized that rates of apoptosis and neurogenesis from embryonic development through to adulthood occur in a balanced manner. Earlier studies have suggested that autocrine or paracrine secretions may play a role in the proliferation, survival and differentiation of developing granule neurons (Gao et al., 1991; Mumm et al., 1996; Ueki et al., 2003; Wu et al., 2003). Although various experimental paradigms have indicated regulatory roles for the neurotrophin BDNF in these events (Lin et al., 1998; Borghesani et al., 2002) and other cytokines (Tao et al., 1997;

Unsicker and Strelau, 2000; Pratt and McPherson, 1997; Alder et al., 1999; Angleley et al., 2003), little is known about the identity of the intrinsic and environmental signals that maintain the equilibrium between neuronal birth, maturation and death.

The appearance and differentiation of cerebellar and hippocampal granule neurons overlap only transiently: cerebellar granule cells enter a post-mitotic state at P7-14, i.e. when hippocampal granule cell neurogenesis peaks before gradually declining with increasing age (Schlessinger et al., 1975; Altman and Bayer, 1990; Cameron and McKay, 2001). A recent DNA microarray analysis revealed that cerebellar and hippocampal granule cells display distinct gene expression profiles, even at times when both cell types are undergoing rapid mitosis (Saito et al., 2002).

In an analogous approach to those used previously in animals (Renfranz et al., 1991; Vicario-Abejón et al., 1995), the different developmental profiles in the hippocampus and cerebellum were exploited in the present study to identify factors contributing to the regulation of hippocampal granule cell proliferation and differentiation. By immunocytochemical monitoring of markers of neuronal maturity and proliferative potential (BrdU incorporation) in hippocampal and cerebellar cultures from animals of a given developmental age, we confirmed that, when compared with hippocampal cultures, cerebellar cultures were more mature and mainly postmitotic after 14 d.i.v. Next, cultures of one type were treated with conditioned medium from the other (CM<sub>Cerebellum</sub> and CM<sub>Hippocampus</sub>). Analysis of BrdU uptake revealed that whereas CM<sub>Hippocampus</sub> stimulated proliferation in cerebellar cultures, CM<sub>Cerebellum</sub> treatment inhibited cell proliferation and accelerated neuronal maturation in hippocampal cultures in a dose-dependent manner. The anti-

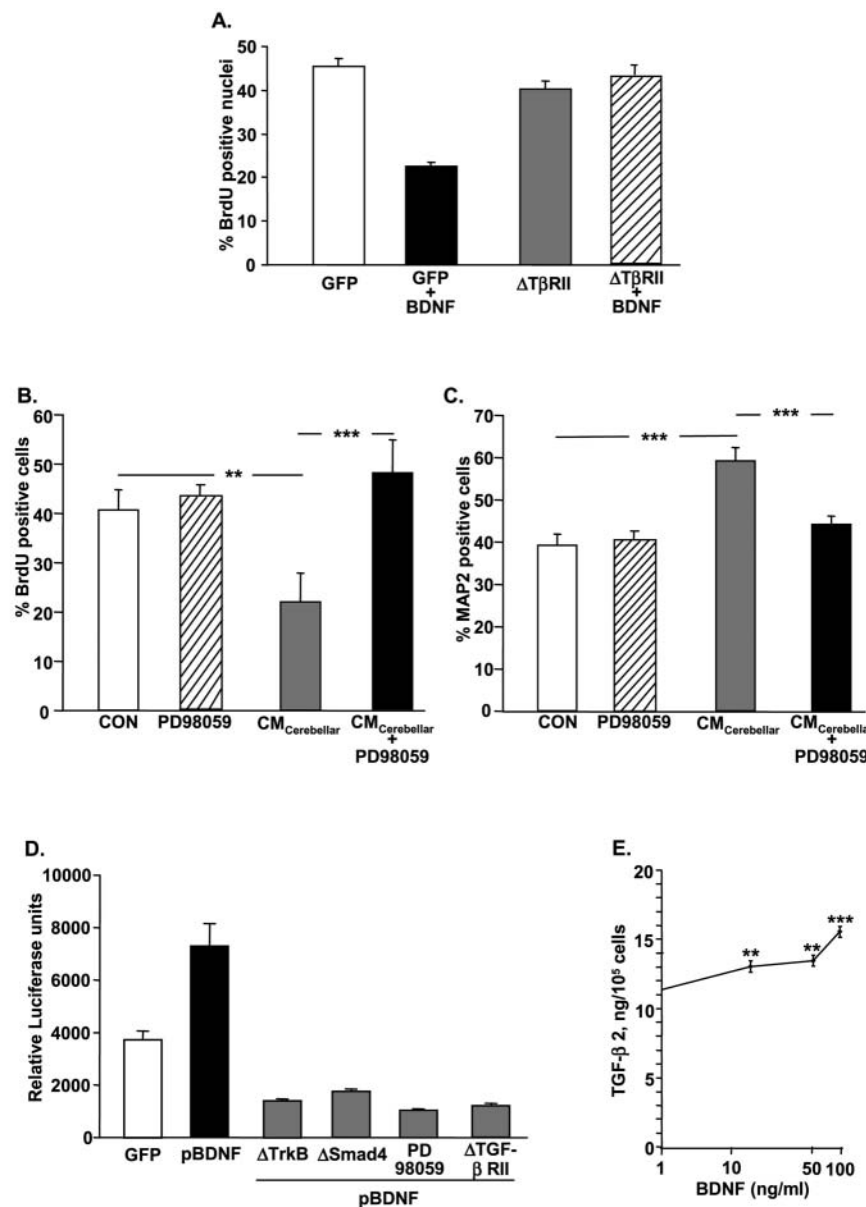

**Fig. 5.** Mechanisms underlying the anti-mitotic and differentiating effects of CM<sub>Cerebellum</sub> and BDNF – possible opportunities for crosstalk with TGF $\beta$  signaling pathways. The anti-proliferative effects of BDNF (measured by BrdU incorporation) are significantly attenuated in primary hippocampal cells expressing a dominant-negative form of TGF $\beta$ -RII. (B,C) The MEK inhibitor PD98059 (0.1  $\mu$ M) counteracts the anti-proliferative (B) and pro-differentiating (C) effects of BDNF. (D) Transient transfection of HiB5 cells with pBDNF results in increased TGF $\beta$ 2 reporter gene (3TP-Lux) expression, an effect that is significantly attenuated by co-transfecting dominant-negative forms ( $\Delta$ ) of either TRKB, TGF $\beta$ -RII or SMAD4, or by pretreatment with PD98059. (E) BDNF dose-dependently increases TGF $\beta$ 2 protein content in primary hippocampal cells; numerical data refer to mean  $\pm$  s.d. ( $n=4-6$ ) \* $P<0.05$ , \*\* $P<0.01$ , \*\*\* $P<0.001$  (versus appropriate controls).

proliferative/pro-differentiating effects of CM<sub>Cerebellum</sub> coincided with increased expression of p21 and p27, two cell cycle arrest-related molecules. Similar results were obtained after treating hippocampus-cerebellum slice co-cultures or a hippocampus-derived cell line (HiB5) with CM<sub>Cerebellum</sub>. Together, these results indicate that cerebellar and hippocampal cells secrete cell type-specific factors in a temporally coordinated manner, and that these factors exert distinct influences on neurogenesis and differentiation.

The loss of biological activity after boiling CM<sub>Cerebellum</sub> hinted at the polypeptide nature of its anti-proliferative/pro-differentiating activities. Importantly, biological potency was retained in CM<sub>Cerebellum</sub> that was subjected to ion exchange chromatography, but the anti-mitotic, apoptotic and differentiating activities eluted at different ionic strengths. Immunoneutralization was used as an approach to identify the active moieties in CM<sub>Cerebellum</sub>; the selection of candidates was based on reports that TGF $\beta$ 2, NGF and BDNF are differentially expressed in hippocampal and cerebellar tissues during development (Unsicker et al., 1991; Sakamoto et al., 1998; Dieni and Rees, 2002). We found that immunoneutralization of BDNF and TGF $\beta$ 2, but not NGF, abrogated the proliferative actions of CM<sub>Cerebellum</sub>. At the same time, pre-adsorption of CM<sub>Cerebellum</sub> with anti-TGF $\beta$ 2 (but not anti-BDNF or anti-NGF) inhibited the pro-differentiating actions of CM<sub>Cerebellum</sub>.

Further studies focused on verifying the roles of TGF $\beta$ 2 and BDNF in the observed CM<sub>Cerebellum</sub>-induced effects on hippocampal cell development. Both TGF $\beta$ 2 and BDNF were found to be more strongly expressed in age-matched cerebellar versus hippocampal cultures (data not shown), and treatment of hippocampal cultures with either cytokine resulted in reduced BrdU incorporation and increased signs of neuronal differentiation.

Three separate genes encode three isoforms of TGF $\beta$ : TGF $\beta$ 1 (normally restricted to the choroid plexus); and the neuron- and glia-expressed isoforms TGF $\beta$ 2 and TGF $\beta$ 3 (Unsicker et al., 1991; Pratt and McPherson, 1997). TGF $\beta$ 1 and TGF $\beta$ 3 have been implicated in neuroprotection, while neurotrophic functions have been ascribed to TGF $\beta$ 2 and TGF $\beta$ 3 (Finch et al., 1993; Böttner et al., 2000; Pratt and McPherson, 1997). The latter include stimulation (Mahanthappa and Schwarting, 1993) or inhibition (Constam et al., 1994) of neurogenesis, or both (Kane et al., 1996), as well as the regulation of neuronal differentiation (Ishihara et al., 1994; Abe et al., 1996; Cameron et al., 1998). TGF $\beta$ 2, the isoform focused on in this work, is expressed in the external granular (neurogenic) layer and in Purkinje and radial glia of the cerebellum according to a strict temporal pattern and, interestingly, appreciable levels of TGF $\beta$ 2 are not seen in other brain sites of neuronal proliferation (Flanders et al., 1991; Constam et al., 1994; Unsicker and Strelau, 2000).

Members of the TGF $\beta$  superfamily signal by sequentially binding to two TGF $\beta$  receptors (TGF $\beta$ -R) that are transmembrane protein serine/threonine kinases; binding of TGF $\beta$  ligand to TGF $\beta$ -RII activates TGF $\beta$ -RI (expressed in the developing and adult rat hippocampus) (Böttner et al., 1996) and its substrates, the receptor-regulated SMAD proteins (R-SMADs). Upon phosphorylation, the latter bind co-SMAD4 and translocate to the nucleus where they form a transcriptionally active complex after association with DNA-

binding partner(s). This complex binds to promoter elements of target genes whose functions include regulation of the cell cycle and differentiation (Moustakas et al., 2001; Chang et al., 2002; Shi and Massagué, 2003). For example, cell cycle arrest by TGF $\beta$  involves suppression of the oncogene *Myc*, a repressor of the CDK inhibitors p21 and p27 (Seoane et al., 2002; Gartel and Shchors, 2003). Supporting the view that TGF $\beta$ 2 may be responsible for at least some of the anti-mitogenic activity of CM<sub>Cerebellum</sub> we here observed an upregulation of p21 and p27 after CM<sub>Cerebellum</sub> treatment of proliferating hippocampal neurons.

Additional evidence for a key role of TGF $\beta$ 2 in the hippocampal cell fate-determining actions of CM<sub>Cerebellum</sub> was obtained by studying TGF $\beta$  signal-propagating SMAD proteins. Of the various members of the SMAD system, SMAD2 and SMAD3 mediate TGF $\beta$  signals. SMAD4 is a requisite partner for transcriptional activity of all SMADs, including SMAD2 and SMAD3; the generation of specific downstream responses is presumed to depend on the formation of specific R-SMAD-SMAD4 complexes that then recruit different sequence-specific DNA-binding factors (Massagué and Wotton, 2000). We demonstrated that CM<sub>Cerebellum</sub> treatment can induce nuclear translocation of EGFP-SMAD2 and EGFP-SMAD4. Essential roles for SMAD3 and SMAD4 were demonstrated insofar that transient expression of the dominant-negative forms of either of these molecules in hippocampal cells prevented CM<sub>Cerebellum</sub>-induced transactivation of the TGF $\beta$  reporter gene (3TP-Lux) and abrogated the anti-proliferative and pro-differentiating effects of CM<sub>Cerebellum</sub>. Further support for the view that TGF $\beta$ 2, at least partially, accounts for the anti-proliferative activity present in CM<sub>Cerebellum</sub> is provided by the observation that expression of a vector containing a dominant-negative form of TGF $\beta$ RII in either primary hippocampal cells or a hippocampus-derived cell line (HiB5) abolishes CM<sub>Cerebellum</sub>-induced effects on BrdU incorporation and 3TP-Lux reporter activity.

As already mentioned, hippocampal cells responded to exogenous BDNF (or a BDNF-expressing plasmid) with an inhibition of BrdU uptake, and an increase in the number of MAP2a/b neurons and neuritic lengths; the effects of this neurotrophin therefore closely resembled those of TGF $\beta$ 2. BDNF effects on neuronal differentiation are mediated through TRKB receptors (Klein et al., 1991) and BDNF can either promote or inhibit neuronal proliferation by activating the TRK-MAPK-ERK pathway (Marshall, 1995; Du et al., 2003), thus raising the issue of whether ERK signaling is involved in the biological actions of CM<sub>Cerebellum</sub>. We found that upstream (MEK) inhibition of this pathway using PD98059 negates the proliferative and differentiating actions of CM<sub>Cerebellum</sub>. Furthermore, we observed that transient expression of a dominant-negative form of TRKB in hippocampal cells abolishes CM<sub>Cerebellum</sub>-induced effects on proliferation and differentiation, while, at the same time, abolishing the ability of CM<sub>Cerebellum</sub> to induce nuclear translocation of SMAD2 and SMAD4, and TGF $\beta$  3TP-Lux transactivation. These findings are consistent with previous reports that suggested crosstalk (Lutz et al., 2004) or interdependence/synergism (Unsicker and Strelau, 2000) between these trophic factors and their signal transduction pathways. Additional support for this interpretation is

provided by our observation that BDNF cannot stimulate 3TP-Lux reporter activity after functional blockade of SMAD4 and TGF $\beta$ -RII expression, and that expression of a dominant-negative form of TGF $\beta$ RII attenuates the anti-proliferative activity of BDNF. In an initial analysis of the upstream mechanisms that might be responsible for crosstalk between the BDNF and TGF $\beta$  pathways, we found that BDNF can stimulate the cellular content of TGF $\beta$ 2 in hippocampal cells; unfortunately, limited assay sensitivity precluded information on whether BDNF can also stimulate TGF $\beta$ 2 secretion. Seoane et al. (Seoane et al., 2002) showed that TGF $\beta$  can induce cell cycle arrest by activating cdk inhibitors such as p21 and p27. The present study shows that both these latter proteins are upregulated in hippocampal cells after exposure to CM<sub>Cerebellum</sub>, raising the following questions for future research. Do BDNF-activated TRKB receptors induce cell cycle arrest? If so, is the TGF $\beta$ /SMAD pathway involved?

In summary, we have demonstrated that BDNF and TGF $\beta$ 2 and their respective signaling machineries, by acting in a dynamic, but strictly coordinated, spatiotemporal fashion, play a decisive role in determining hippocampal cell fate by inhibiting cell proliferation and promoting neuronal differentiation. We have also shown that BDNF, better known for TRK receptor-mediated promotion of neurogenesis and differentiation (Klein et al., 1991; Gao et al., 1995; Pencea et al., 2001), can exert anti-proliferative and pro-differentiating effects on hippocampal granule cells by activating MAPK and, subsequently, TGF $\beta$  signaling pathways; the latter is a novel observation and provides a mechanism through which diverse cytokine signals can converge on a common signaling 'hub' to direct neuronal development.

J.L. was supported by a Max Planck Society Fellowship. The work was partly supported through an exchange grant from the DAAD-ICCTI Program Aççoes Integradas Luso Alemãs (314-Al-p-dr). The authors thank Dale Milfay for her interest, encouragement and help; Drs Eero Castren, Rik Derynck, Oliver Griesbeck, Kelly Mayo and Joan Massague for plasmids; Dr Jane Johnson for antisera; Dr Nina Rosenqvist for HiB5 cells; Dr Marilyn Tirard for advice on the transfection studies; Jutta Jasbinsek and Dieter Fischer for technical help; and Carola Hetzel for editorial help.

## References

- Abe, K., Chu, P. J., Ishihara, A. and Saito, H. (1996). Transforming growth factor-beta 1 promotes re-elongation of injured axons of cultured rat hippocampal neurons. *Brain Res.* **723**, 206-209.
- Abe, M., Harpel, J. G., Metz, C. N., Nunes, L., Loskutoff, D. J. and Rifkin, D. B. (1994). An assay for transforming growth factor-beta using cells transfected with a plasminogen activator inhibitor-1 promoter-luciferase construct. *Anal. Biochem.* **216**, 276-284.
- Alder, J., Lee, K. J., Jessell, T. M. and Hatten, M. E. (1999). Generation of cerebellar granule neurons in vivo by transplantation of BMP-treated neural progenitor cells. *Nat. Neurosci.* **2**, 535-540.
- Almeida, O. F. X., Conde, G. L., Crochemore, C., Demeneix, B. A., Fischer, D., Hassan, A. H., Meyer, M., Holsboer, F. and Michaelidis, T. M. (2000). Subtle shifts in the ratio between pro- and antiapoptotic molecules after activation of corticosteroid receptors decide neuronal fate. *FASEB J.* **14**, 779-790.
- Altman, J. (1972). Postnatal development of the cerebellar cortex in the rat. 3. Maturation of the components of the granular layer. *J. Comp. Neurol.* **145**, 465-513.
- Altman, J. and Bayer, S. A. (1990). Migration and distribution of two populations of hippocampal granule cell precursors during the perinatal and postnatal periods. *J. Comp. Neurol.* **301**, 365-381.
- Angley, C., Kumar, M., Dinsio, K. J., Hall, A. K. and Siegel, R. E. (2003). Signaling by bone morphogenetic proteins and Smad1 modulates the postnatal differentiation of cerebellar cells. *J. Neurosci.* **23**, 260-268.
- Attisano, L. and Wrana, J. L. (2002). Signal transduction by the TGF-beta superfamily. *Science* **296**, 1646-1647.
- Ben-Arie, N., Bellen, H. J., Armstrong, D. L., McCall, A. E., Gordadze, P. R., Guo, Q., Matzuk, M. M. and Zoghbi, H. Y. (1997). Math1 is essential for genesis of cerebellar granule neurons. *Nature* **390**, 169-172.
- Borghesani, P. R., Peyrin, J. M., Klein, R., Rubin, J., Carter, A. R., Schwartz, P. M., Luster, A., Corfas, G. and Segal, R. A. (2002). BDNF stimulates migration of cerebellar granule cells. *Development* **129**, 1435-1442.
- Böttner, M., Unsicker, K. and Suter-Crazzolara, C. (1996). Expression of TGF-beta type II receptor mRNA in the CNS. *NeuroReport* **7**, 2903-2907.
- Böttner, M., Krieglstein, K. and Unsicker, K. (2000). The transforming growth factor-betas: structure, signaling, and roles in nervous system development and functions. *J. Neurochem.* **75**, 2227-2240.
- Cameron, H. A. and McKay, R. D. (2001). Adult neurogenesis produces a large pool of new granule cells in the dentate gyrus. *J. Comp. Neurol.* **435**, 406-417.
- Cameron, H. A., Hazel, T. G. and McKay, R. D. (1998). Regulation of neurogenesis by growth factors and neurotransmitters. *J. Neurobiol.* **36**, 287-306.
- Chang, H., Brown, C. W. and Matzuk, M. M. (2002). Genetic analysis of the mammalian transforming growth factor-beta superfamily. *Endocr. Rev.* **23**, 787-823.
- Constam, D. B., Schmid, P., Aguzzi, A., Schachner, M. and Fontana, A. (1994). Transient production of TGF-beta 2 by postnatal cerebellar neurons and its effect on neuroblast proliferation. *Eur. J. Neurosci.* **6**, 766-778.
- Coskun, V. and Luskin, M. B. (2002). Intrinsic and extrinsic regulation of proliferation and differentiation of cells in the rodent rostral migratory stream. *J. Neurosci. Res.* **69**, 795-802.
- Crochemore, C., Lu, J., Wu, Y., Liposits, Z., Sousa, N., Holsboer, F. and Almeida, O. F. (2005). Direct targeting of hippocampal neurons for apoptosis by glucocorticoids is reversible by mineralocorticoid receptor activation. *Mol. Psychiatry* doi:10.1038/sj.mp.4001679.
- Dieni, S. and Rees, S. (2002). Distribution of brain-derived neurotrophic factor and TrkB receptor proteins in the fetal and postnatal hippocampus and cerebellum of the guinea pig. *J. Comp. Neurol.* **454**, 229-240.
- Dreyfus, C. F. (1998). Neurotransmitters and neurotrophins collaborate to influence brain development. *Perspect. Dev. Neurobiol.* **5**, 389-399.
- Du, J., Cai, S., Suzuki, H., Akhand, A. A., Ma, X., Takagi, Y., Miyata, T., Nakashima, I. and Nagase, F. (2003). Involvement of MEKK1/ERK/P21Waf1/Cip1 signal transduction pathway in inhibition of IGF-I-mediated cell growth response by methylglyoxal. *J. Cell Biochem.* **88**, 1235-1246.
- Finch, C. E., Laping, N. J., Morgan, T. E., Nichols, N. R. and Pasinetti, G. M. (1993). TGF-beta 1 is an organizer of responses to neurodegeneration. *J. Cell Biochem.* **53**, 314-322.
- Flanders, K. C., Ludecke, G., Engels, S., Cissel, D. S., Roberts, A. B., Kondaiah, P., Lafyatis, R., Sporn, M. B. and Unsicker, K. (1991). Localization and actions of transforming growth factor-beta-s in the embryonic nervous system. *Development* **113**, 183-191.
- Gao, W. O., Heintz, N. and Hatten, M. E. (1991). Cerebellar granule cell neurogenesis is regulated by cell-cell interactions in vitro. *Neuron* **6**, 705-715.
- Gao, W. Q., Zheng, J. L. and Karihaloo, M. (1995). Neurotrophin-4/5 (NT-4/5) and brain-derived neurotrophic factor (BDNF) act at later stages of cerebellar granule cell differentiation. *J. Neurosci.* **15**, 2656-2667.
- Gartel, A. L. and Shchors, K. (2003). Mechanisms of c-myc-mediated transcriptional repression of growth arrest genes. *Exp. Cell Res.* **283**, 17-21.
- Ishihara, A., Saito, H. and Abe, K. (1994). Transforming growth factor-beta 1 and -beta 2 promote neurite sprouting and elongation of cultured rat hippocampal neurons. *Brain Res.* **639**, 21-25.
- Kane, C. J., Brown, G. J. and Phelan, K. D. (1996). Transforming growth factor-beta 2 both stimulates and inhibits neurogenesis of rat cerebellar granule cells in culture. *Dev. Brain Res.* **96**, 46-51.
- Klein, R., Nanduri, V., Jing, S. A., Lamballe, F., Tapley, P., Bryant, S., Cordon-Cardo, C., Jones, K. R., Reichardt, L. F. and Barbacid, M. (1991). The trkB tyrosine protein kinase is a receptor for brain-derived neurotrophic factor and neurotrophin-3. *Cell* **66**, 395-403.
- Kuhn, H. G., Dickinson-Anson, H. and Gage, F. H. (1996). Neurogenesis in the dentate gyrus of the adult rat: age-related decrease of neuronal progenitor proliferation. *J. Neurosci.* **16**, 2027-2033.



- Lin, X., Cui, H. and Bulleit, R. F. (1998). BDNF accelerates gene expression in cultured cerebellar granule neurons. *Dev. Brain Res.* **105**, 277-286.
- Lutz, M., Kriegstein, K., Schmitt, S., ten Dijke, P., Sebald, W., Wizenmann, A. and Knaus, P. (2004). Nerve growth factor mediates activation of the Smad pathway in PC12 cells. *Eur. J. Biochem.* **271**, 920-931.
- Mahanthappa, N. K. and Schwarting, G. A. (1993). Peptide growth factor control of olfactory neurogenesis and neuron survival in vitro: roles of EGF and TGF-betas. *Neuron* **10**, 293-305.
- Marshall, C. J. (1995). Specificity of receptor tyrosine kinase signaling: transient versus sustained extracellular signal-regulated kinase activation. *Cell* **80**, 179-185.
- Massagué, J. and Wotton, D. (2000). Transcriptional control by the TGF-beta/Smad signaling system. *EMBO J.* **19**, 1745-1754.
- Massagué, J., Blain, W. and Lo, R. S. (2000). TGF $\beta$  signaling in growth control, cancer, and heritable disorders. *Cell* **103**, 295-309.
- McConnell, S. K. and Kaznowski, C. E. (1991). Cell cycle dependence of laminar determination in developing neocortex. *Science* **254**, 282-285.
- Minichillo, L. and Klein, R. (1996). TrkB and TrkC neurotrophin receptors cooperate in promoting survival of hippocampal and cerebellar granule neurons. *Genes Dev.* **10**, 2849-2858.
- Monyer, H., Burnashev, N., Laurie, D. J., Sakmann, B. and Seeburg, P. H. (1994). Developmental and regional expression in the rat brain and functional properties of four NMDA receptors. *Neuron* **12**, 529-540.
- Moustakas, A., Souchelnytskyi, S. and Heldin, C. H. (2001). Smad regulation in TGF-beta signal transduction. *J. Cell Sci.* **114**, 4359-4369.
- Mumm, J. S., Shou, J. and Calof, A. L. (1996). Colony-forming progenitors from mouse olfactory epithelium: evidence for feedback regulation of neuron production. *Proc. Natl. Acad. Sci. USA* **93**, 11167-11172.
- Norberg, J., Kristensen, B. W. and Zimmer, J. (1999). Markers for neuronal degeneration in organotypic slice cultures. *Brain Res. Protoc.* **3**, 278-290.
- Pencea, V., Bingaman, K. D., Wiegand, S. J. and Luskin, M. B. (2001). Infusion of brain-derived neurotrophic factor into the lateral ventricle of the adult rat leads to new neurons in the parenchyma of the striatum, septum, thalamus, and hypothalamus. *J. Neurosci.* **21**, 6706-6717.
- Pera, E. M., Ikeda, A., Eivers, E. and DeRobertis, E. M. (2003). Integration of IGF, FGF, and anti-BMP signals via Smad1 phosphorylation in neural induction. *Genes Dev.* **17**, 3023-3028.
- Pleasure, S. J., Collins, A. E. and Lowenstein, D. H. (2000). Unique expression patterns of cell fate molecules delineate sequential stages of dentate gyrus development. *J. Neurosci.* **20**, 6095-6105.
- Pratt, B. M. and McPherson, J. M. (1997). TGF-beta in the central nervous system: potential roles in ischemic injury and neurodegenerative diseases. *Cytokine Growth Factor Rev.* **8**, 267-292.
- Ramon y Cajal, S. (1911). *Histologie du Systeme Nerveux de l'Homme et des Vertebres*. Paris: Maloine (reprinted by Consejo Superior de Investigaciones Cientificas, Madrid, 1955).
- Renfranz, P. J., Cunningham, M. G. and McKay, R. D. (1991). Region-specific differentiation of the hippocampal stem cell line HiB5 upon implantation into the developing mammalian brain. *Cell* **66**, 713-729.
- Ross, S. E., Greenberg, M. E. and Stiles, C. D. (2003). Basic helix-loop-helix factors in cortical development. *Neuron* **39**, 13-25.
- Saito, S., Matoba, R., Ueno, N., Matsubara, K. and Kato, K. (2002). Comparison of gene expression profiling during postnatal development of mouse dentate gyrus and cerebellum. *Physiol. Genom.* **8**, 131-137.
- Sakamoto, H., Kuzuya, H., Tamaru, M., Sugimoto, S., Shimizu, J., Fukushima, M., Yazaki, T., Yamazaki, T. and Nagata, Y. (1998). Developmental changes in the NGF content in the brain of young, growing, low-birth-weight rats. *Neurochem. Res.* **23**, 115-120.
- Schlessinger, A., Cowan, W. M. and Gottlieb, D. I. (1975). An autoradiographic study of the time of origin and the pattern of granule cell migration in the dentate gyrus of the rat. *J. Comp. Neurol.* **159**, 149-175.
- Segal, R. A. and Greenberg, M. E. (1996). Intracellular signaling pathways activated by neurotrophic factor. *Annu. Rev. Neurosci.* **19**, 463-489.
- Seoane, J., Le, H. V. and Massague, J. (2002). Myc suppression of the p21(Cip1) Cdk inhibitor influences the outcome of the p53 response to DNA damage. *Nature* **419**, 729-734.
- Shi, Y. and Massague, J. (2003). Mechanisms of TGF-beta signaling from cell membrane to the nucleus. *Cell* **113**, 685-700.
- Suhonen, J. O., Peterson, D. A., Ray, J. and Gage, F. H. (1996). Differentiation of adult hippocampus-derived progenitors into olfactory neurons in vivo. *Nature* **383**, 624-627.
- Tao, Y., Black, I. B. and DiCicco-Bloom, E. (1997). In vivo neurogenesis is inhibited by neutralizing antibodies to basic fibroblast growth factor. *J. Neurobiol.* **33**, 289-296.
- Ueki, T., Tanaka, M., Yamashita, K., Mikawa, S., Qiu, Z., Maragakis, N. J., Hevner, R. F., Miura, N., Sugimura, H. and Sato, K. A. (2003). A novel secretory factor, Neurogenesisin-1, provides neurogenic environmental cues for neural stem cells in the adult hippocampus. *J. Neurosci.* **23**, 11732-11740.
- Unsicker, K. and Strelau, J. (2000). Functions of transforming growth factor-beta isoforms in the nervous system. Cues based on localization and experimental in vitro and in vivo evidence. *Eur. J. Biochem.* **267**, 6972-6975.
- Unsicker, K., Flanders, K. C., Cissel, D. S., Lafyatis, R. and Sporn, M. B. (1991). Transforming growth factor beta isoforms in the adult rat central and peripheral nervous system. *Neuroscience* **44**, 613-625.
- Vaudry, D., Falluel-Morel, A., Leuillet, S., Vaudry, H. and Gonzalez, B. J. (2003). Regulators of cerebellar granule cell development act through specific signaling pathways. *Science* **300**, 1532-1534.
- Vicario-Abejón, C., Cunningham, M. G. and McKay, R. D. (1995). Cerebellar precursors transplanted to the neonatal dentate gyrus express features characteristic of hippocampal neurons. *J. Neurosci.* **15**, 6351-6363.
- Wrana, J. L., Attisano, L., Wieser, R., Ventura, F. and Massagué, J. (1994). Mechanism of activation of the TGF-beta receptor. *Nature* **370**, 341-347.
- Wu, H. H., Ivkovic, S., Murray, R. C., Jaramillo, S., Lyons, K. M., Johnson, J. E. and Calof, A. L. (2003). Autoregulation of neurogenesis by GDF11. *Neuron* **37**, 197-207.
- Yoshimura, S., Takagi, Y., Harada, J., Teramoto, T., Thomas, S. S., Waeber, C., Bakowska, J. C., Breakefield, X. O. and Moskowitz, M. A. (2001). FGF-2 regulation of neurogenesis in adult hippocampus after brain injury. *Proc. Natl. Acad. Sci. USA* **98**, 5874-5879.
